# Supplementary material for: Cryptococcus neoformans Secretes Small Molecules That Inhibit IL-1β Inflammasome-Dependent Secretion
Source: Hindawi journal article supplement (doi:10.1155/2020/3412763), 2020-12-07
Supplement: f1 [file 3412763.f1.pdf]

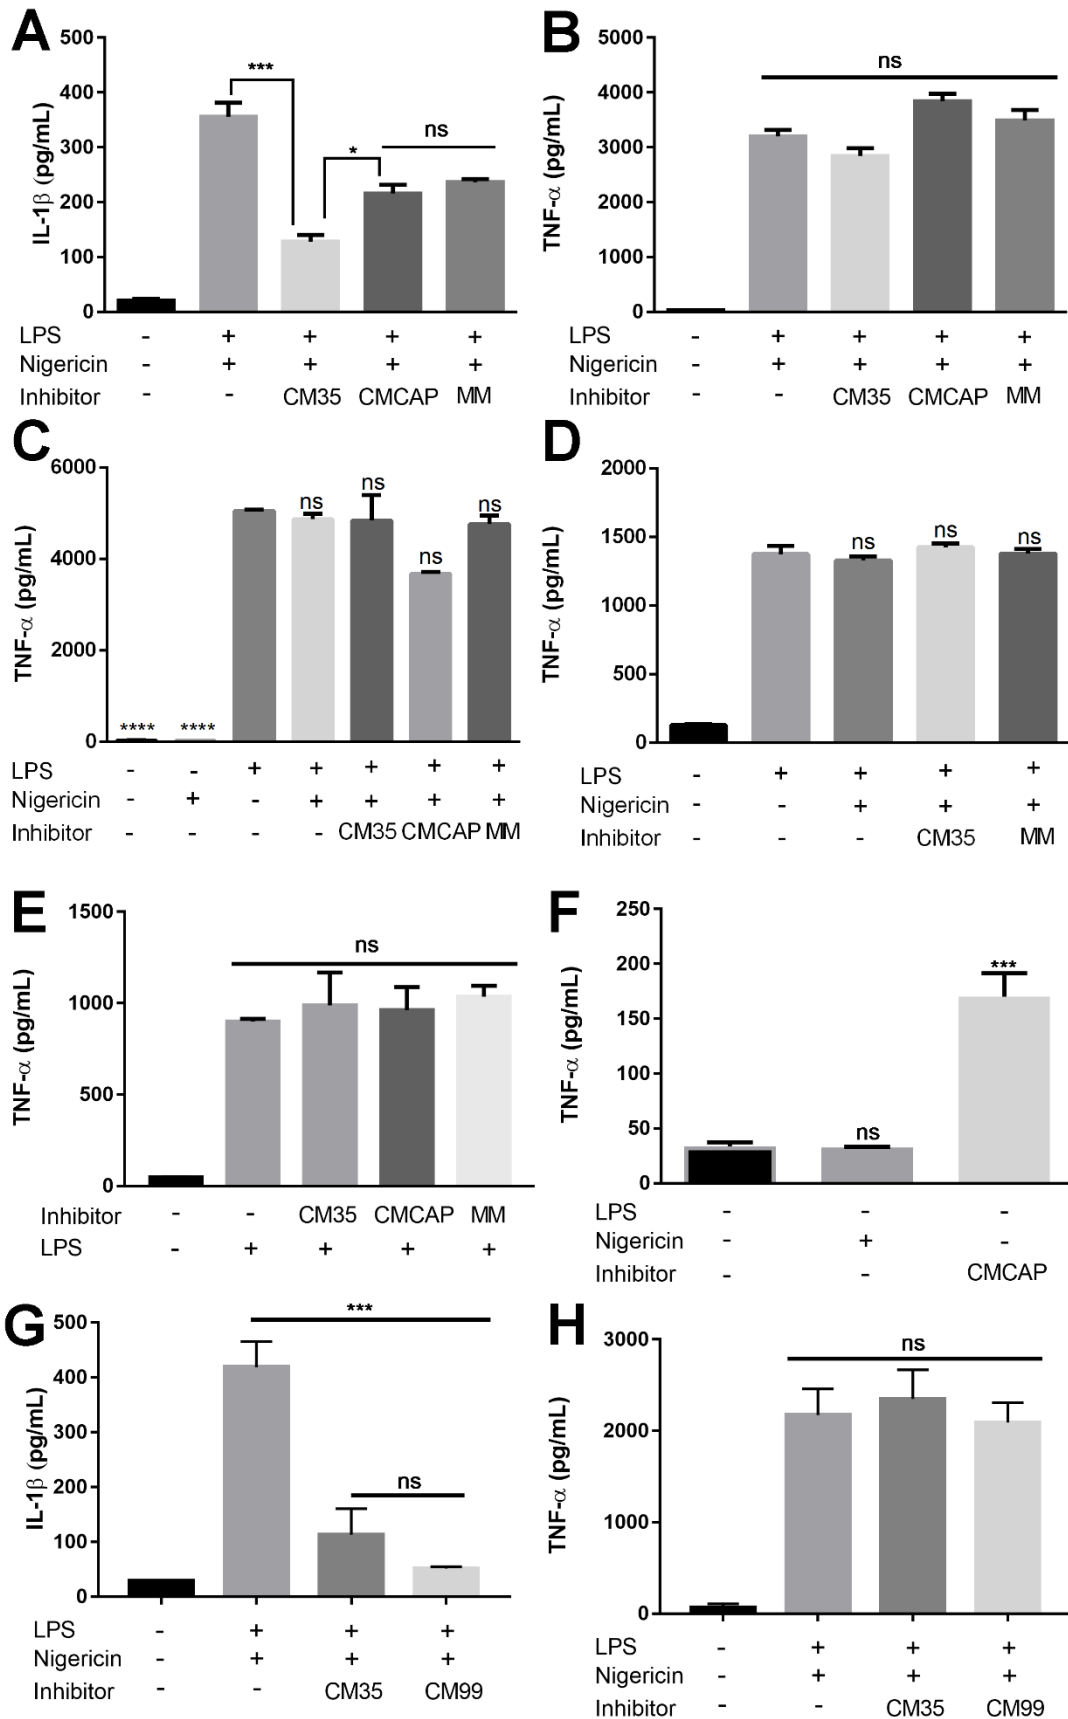

**S1 Fig. CM35, but not CMCAP or Minimal Media is able to reduce IL-1 $\beta$  secretion.**

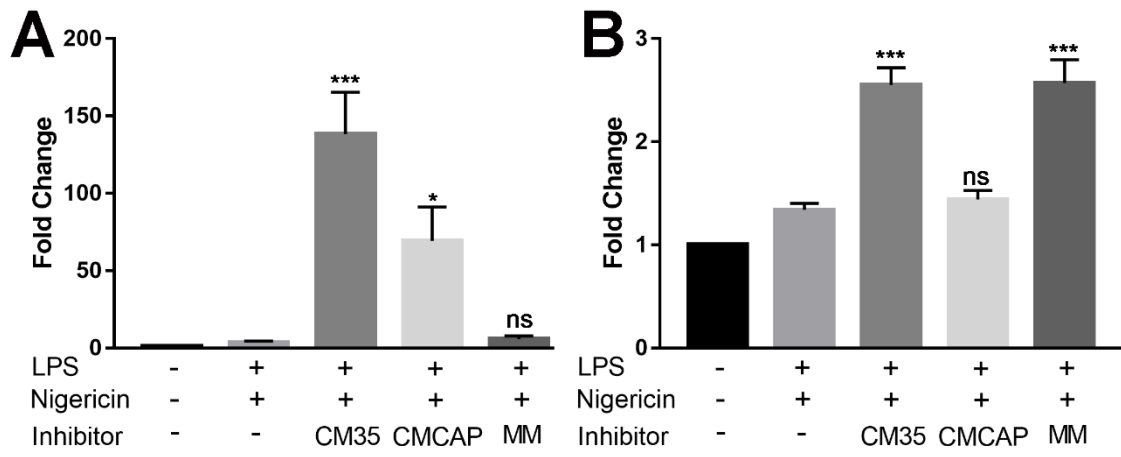

**S2 Fig. CMs induce IL-1 $\beta$  transcription in activated macrophages.**

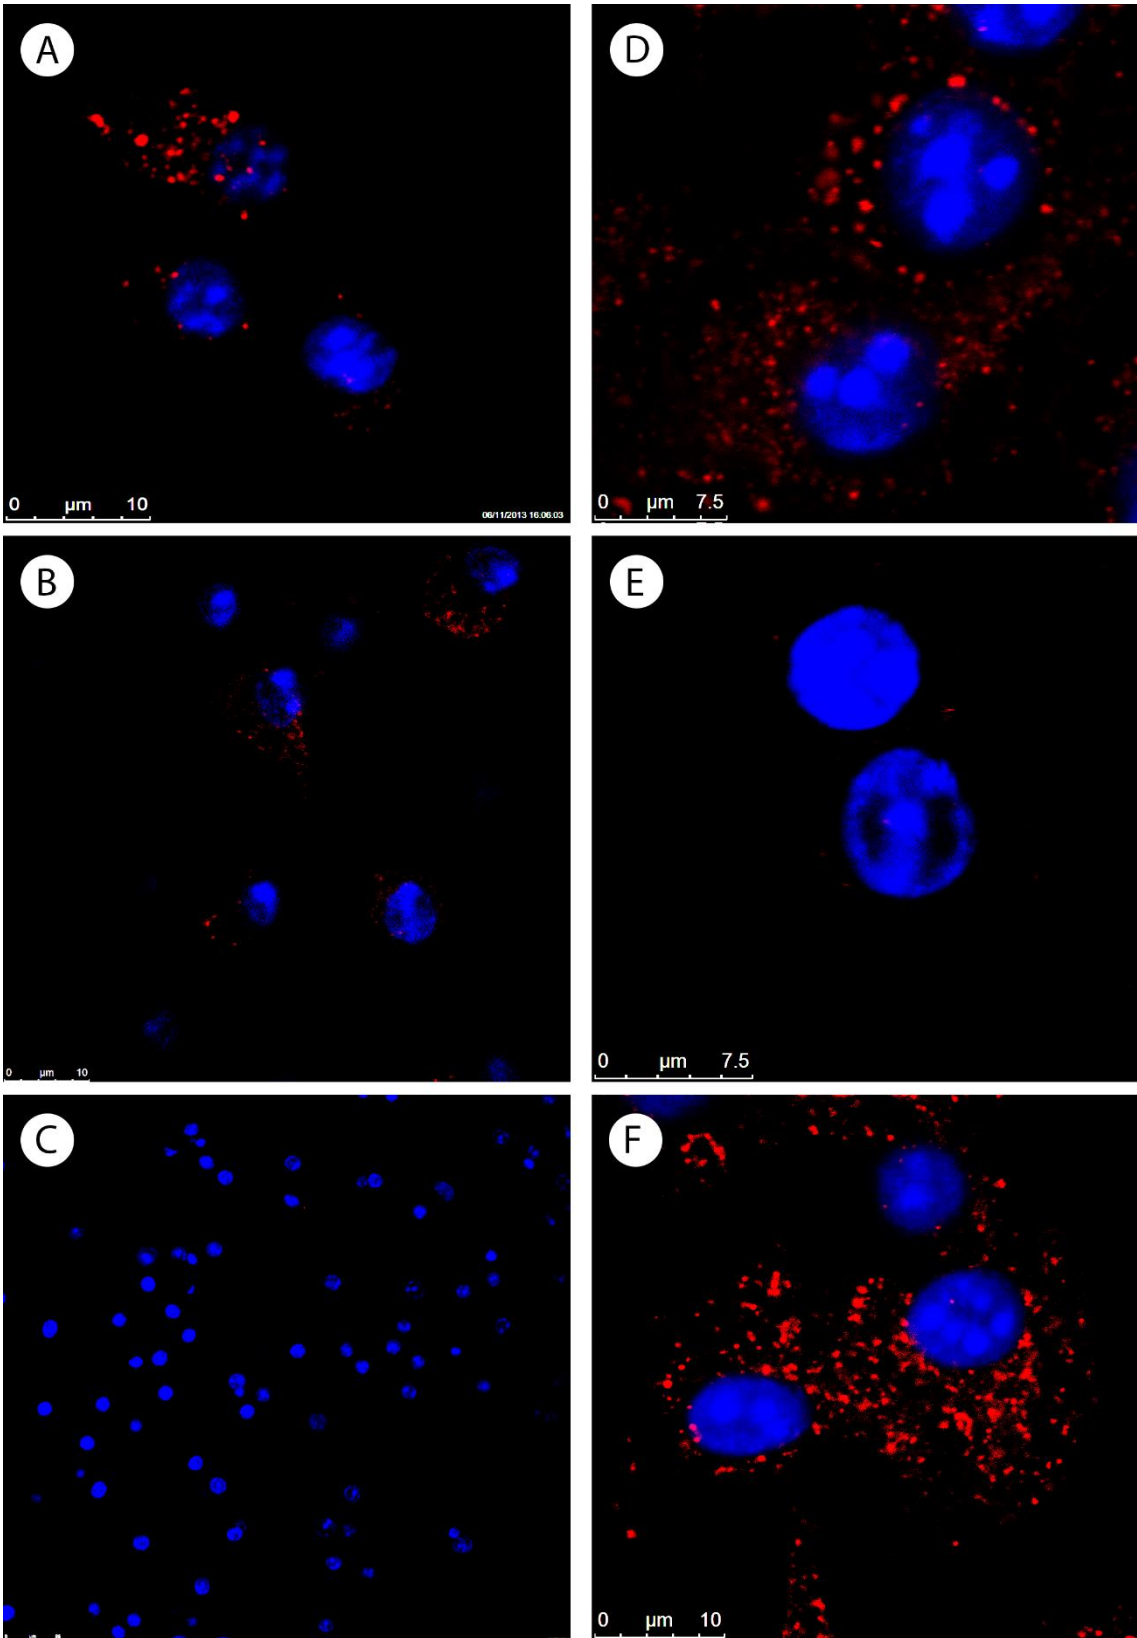

S3 Fig. GXM detection in CM samples.

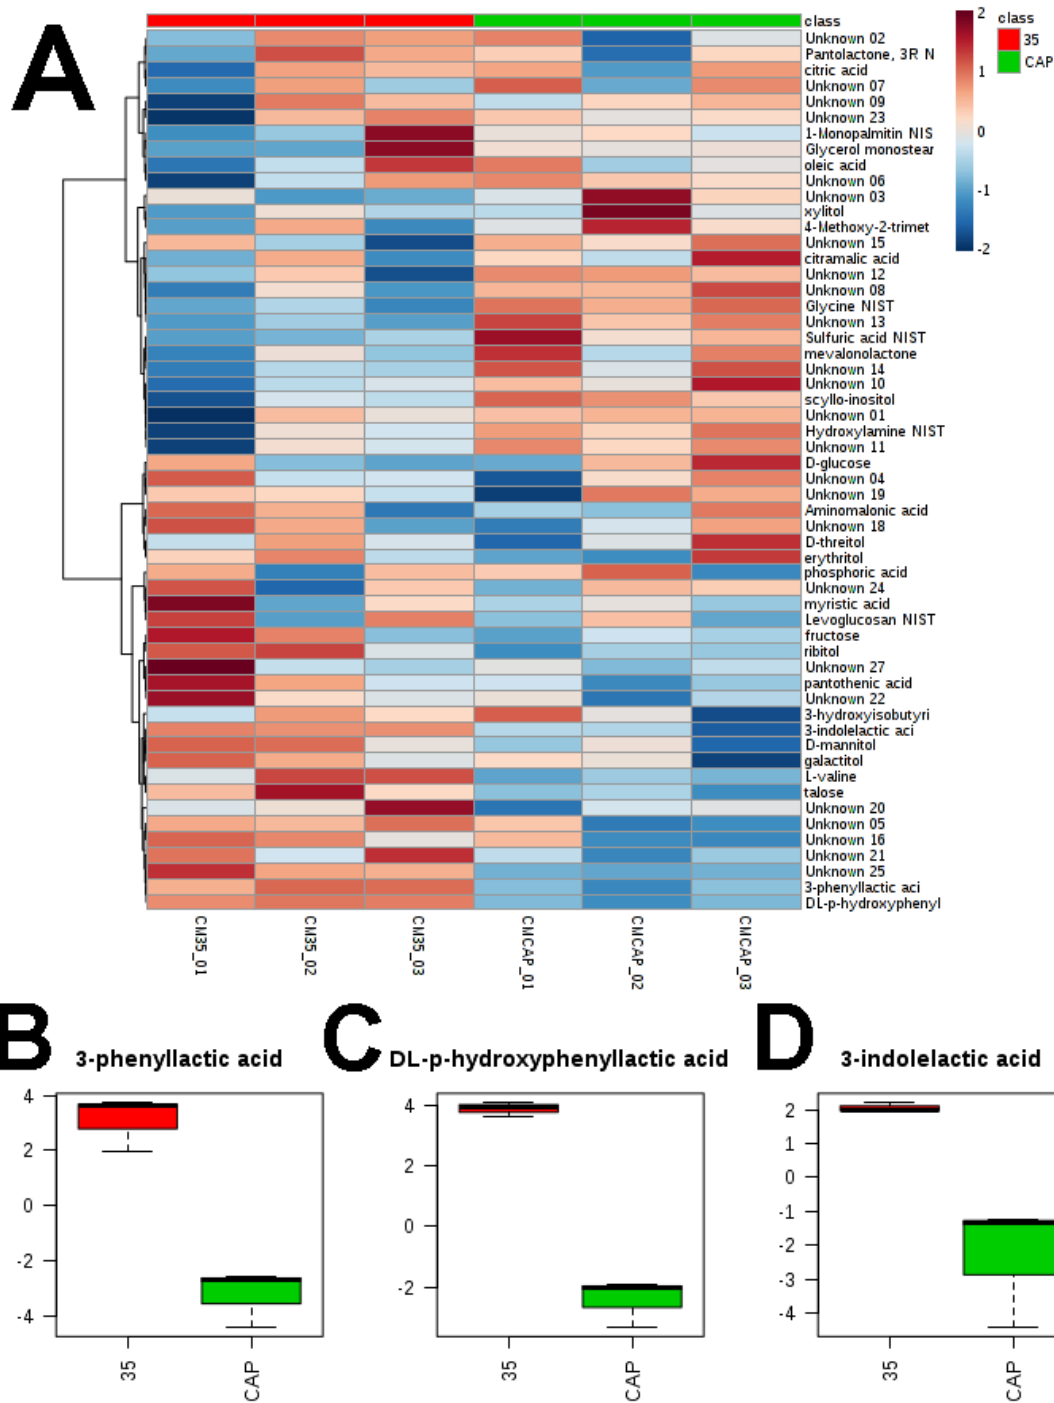

S4 Fig. Mass spectrometry comparative CM analysis.
